# Supplementary material for: Bioactivity of Ionic Liquids Based on Valproate in SH-SY5Y Human Neuroblastoma Cell Line
Source: MDPI journal article supplement (doi:10.3390/futurepharmacol2030022), 2022-08-31
Supplement: s1 [file s1]

# Supplementary Materials: Bioactivity of Ionic Liquids based on Valproate in SH-SY5Y Human Neuroblastoma Cell Line

Ana Rita Dias, Ricardo Ferraz, João Costa-Rodrigues, Andreia F. M. Santos, Manuel L. Jacinto, Cristina Prudêncio, João Paulo Noronha, Luis C. Branco and Željko Petrovski

## 1. Detailed Synthetic Procedures and Analytical/Spectral Data for the Prepared Compounds

General remarks: Commercially available reagents were purchased from Aldrich (Saint Louis, MO, USA), BDH – laboratory reagents (Poole, UK) and Solchemar and were used as received. The solvents were from Valente & Ribeiro and distilled before used. The basic anion-exchange resin Amberlite IRA-400-OH (ion-exchange capacity 1.4 Eq/mL) was purchased from Supelco (Bellefonte, PA, USA).  $^1\text{H}$  and  $^{13}\text{C}$  NMR spectra in  $(\text{CD}_3)_2\text{SO}$  or  $\text{CD}_3\text{OD}$  (from Euriso-Top, Saint Aubin, France) were recorded on a Bruker AMX400 spectrometer (Bruker, Karlsruhe, Germany) at room temperature unless specified otherwise. Chemical shifts are reported downfield in parts per million (ppm). IR spectra were measured on a Perkin Elmer 683 (Waltham, MA, USA).

### *General Procedure for the Synthesis of the Compounds*

#### Preparation of (2-Hydroxyethyl)trimethylammonium 2-propylpentanoate [Ch][VPA]

Choline chloride (0.2778 g; 1.99 mmol) was dissolved in methanol and passed through ion-exchange column Amberlite IRA-400-OH (5 eq., flow rate 0.133 mL/mL/min = 8 BV/h). Then the choline hydroxide solution was slowly added to valproic acid (0.3181 g; 1.99 mmol; 1.10 eq.) dissolved in methanol. The mixture was stirred at room temperature for 1 h. The solvent and the valproic acid excess were then evaporated and then dried in vacuum for 24 h to provide desired product as liquid (0.4834 g; 98.2%).  $^1\text{H}$  NMR (400.13 MHz,  $\text{CDCl}_3$ )  $\delta$  = 0.84 (t,  $J$  = 7.0 Hz 6H), 1.24-1.53 (m, 8H), 2.12-2.17 (m, 1H), 3.33 (s, 9H), 3.67 (t,  $J$  = 4.6 Hz, 2H), 4.00 (m, 2H) ppm;  $^{13}\text{C}$  NMR (100.62 MHz,  $\text{CDCl}_3$ )  $\delta$  = 14.42, 21.14, 35.54, 47.78, 54.81, 56.25, 68.60, 182.18 ppm; IR (KBr):  $\nu$  = 3410, 2958, 2933, 2873, 2078, 1638, 1552, 1488, 1476, 1468, 1411, 1381, 1356, 1311, 1280, 1222, 1170, 1133, 1110, 1084, 1052, 1007, 956, 925, 864, 751, 668, 618, 558,  $\text{cm}^{-1}$ . Anal. calcd for  $\text{C}_{13}\text{H}_{29}\text{NO}_3 \cdot 2 \text{H}_2\text{O}$  C 56.90, H 11.75, N 5.10, found: C 56.98, H 11.62, N 5.52.

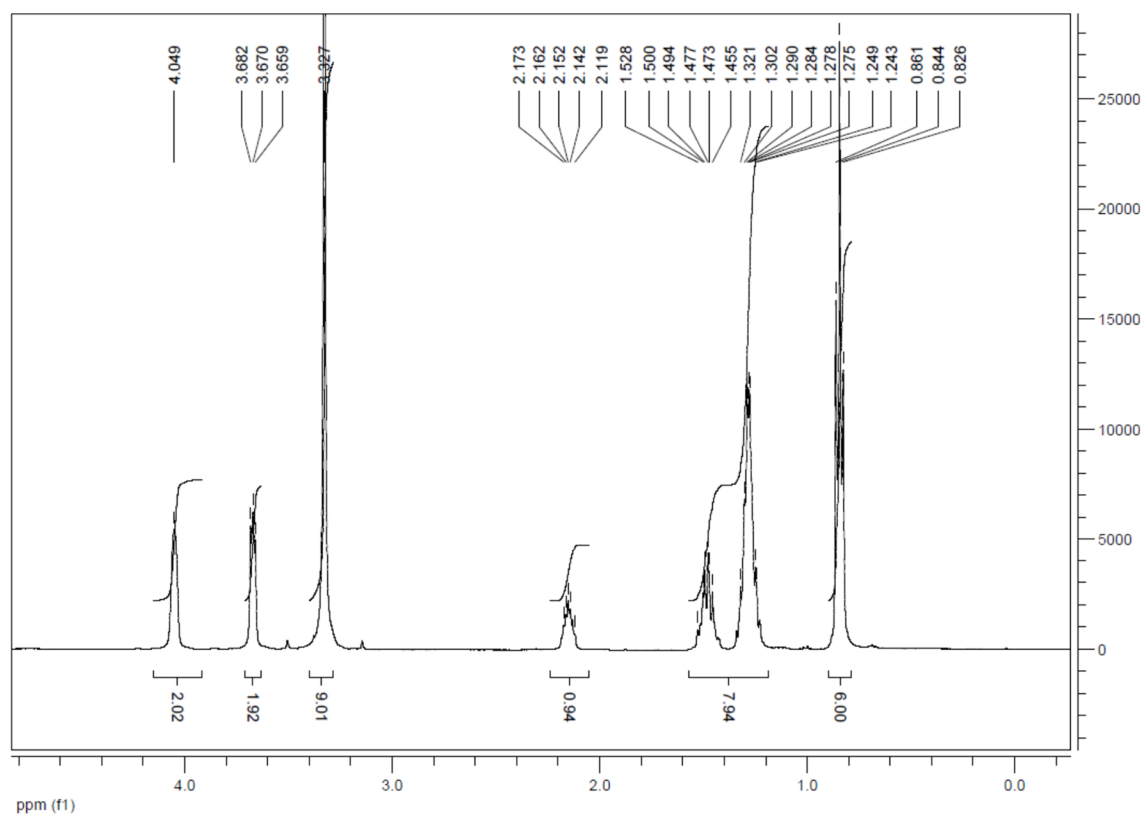

**Figure S1.** [Ch][VPA]  $^1\text{H}$  NMR spectrum in  $\text{CDCl}_3$ .

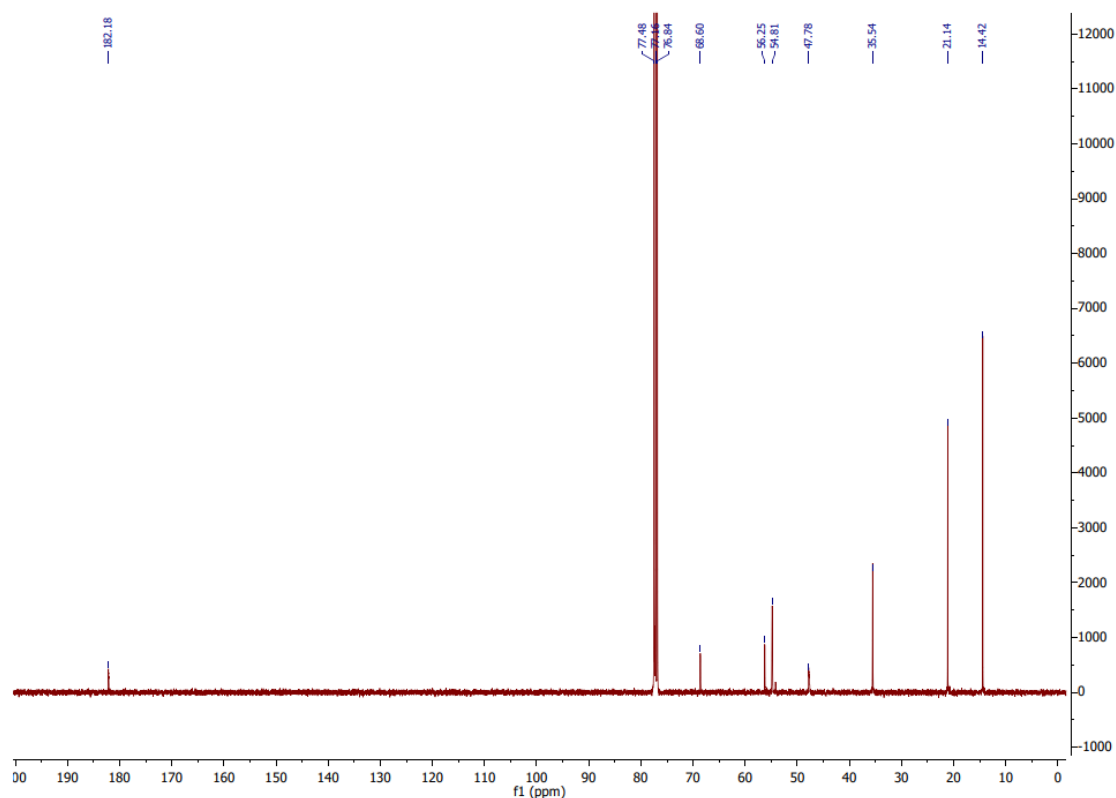

**Figure S2.** [Ch][VPA]  $^{13}\text{C}$  NMR spectrum in  $\text{CDCl}_3$ .

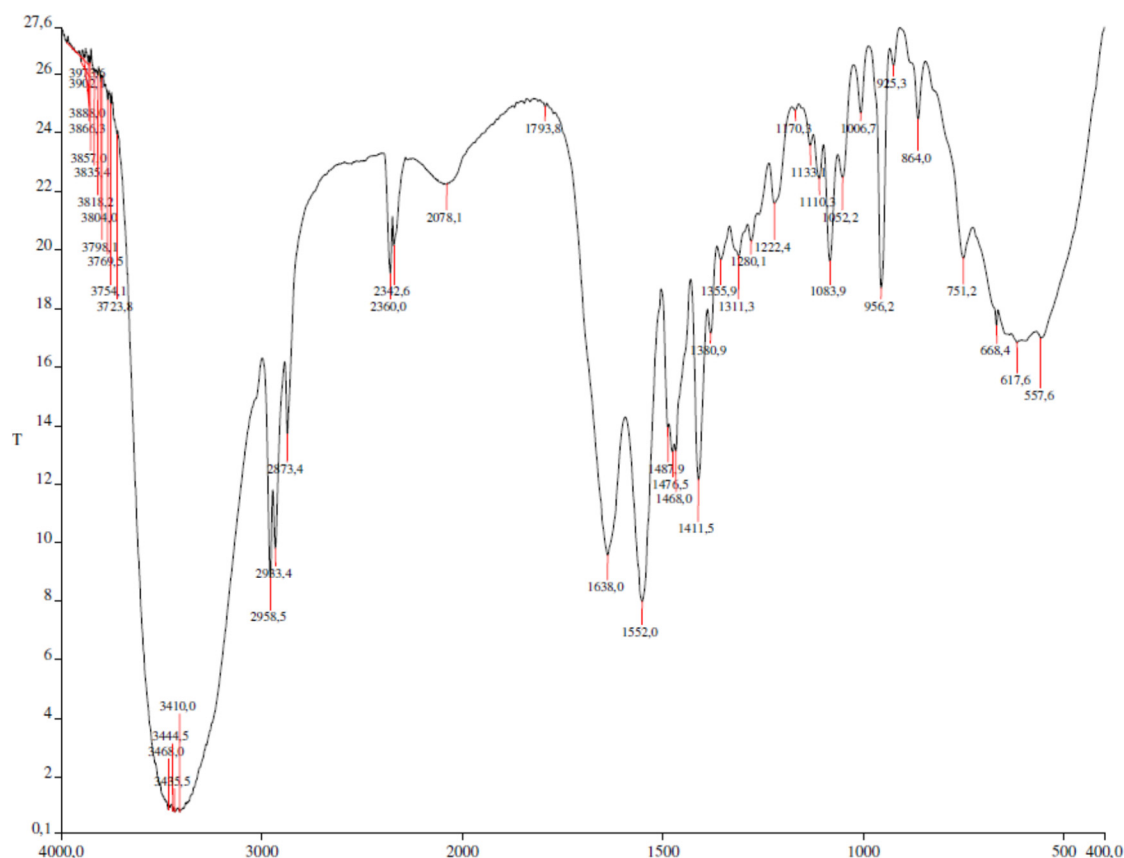

**Figure S3.** [Ch][VPA] IR spectrum in KBr.

#### Preparation of 1-hexadecylpyridinium 2-propylpentanoate [C<sub>16</sub>Pyr][VPA]

Cetylpyridinium chloride (0.717 g; 2.003 mmol), was dissolved in methanol and passed through ion-exchange column Amberlite IRA-400-OH (5 eq., flux rate 0.133 mL/mL/min = 8 BV). Then the cetylpyridinium hydroxide solution was slowly added to valproic acid (0.3039 g; 2.107 mmol; 1.05 eq.) dissolved in methanol. The mixture was stirred at room temperature for 1 h. The solvent and the valproic acid excess were then evaporated and then dried in vacuum for 24 h to provide desired product as liquid (0.8835 g; 98.5%). <sup>1</sup>H NMR (400.13 MHz, CD<sub>3</sub>OD) δ = 0.87-0.93 (m, 9H), 1.29-1.39 (m, 30H), 1.48-1.64 (m, 2H), 2.04 (q, J=7.3Hz), 2.29-2.21 (m, 1H), 4.67-4.63 (m, 2H), 8.13 (t, J=7.0Hz, 2H), 8.61 (tt, J=7.8Hz, 1.4Hz, 1H), 9.04-9.02 (m, 2H).; <sup>13</sup>C NMR (100.62 MHz, CD<sub>3</sub>OD) δ = 14.50, 14.55, 21.98, 23.79, 27.24, 30.16, 30.52, 30.54, 30.66, 30.76, 30.81, 32.55, 33.13, 36.50, 63.17, 118.04, 129.56, 145.91, 145.96, 146.91, 182.56 ppm; IR (KBr): ν = 3460, 3413, 2957, 2924, 2854, 2730, 2680, 1702, 1640, 1578, 1502, 1488, 1466, 1406, 1378, 1356, 1306, 1276, 1249, 1209, 1176, 1109, 1064, 1040, 981, 816, 774, 746, 722, 685, 612, 550, 476 cm<sup>-1</sup>. Anal. calcd for C<sub>29</sub>H<sub>53</sub>NO<sub>2</sub> · 1.5 H<sub>2</sub>O C 73.37, H 11.89, N 2.95, found: C 73.19, H 11.54, N 2.99.

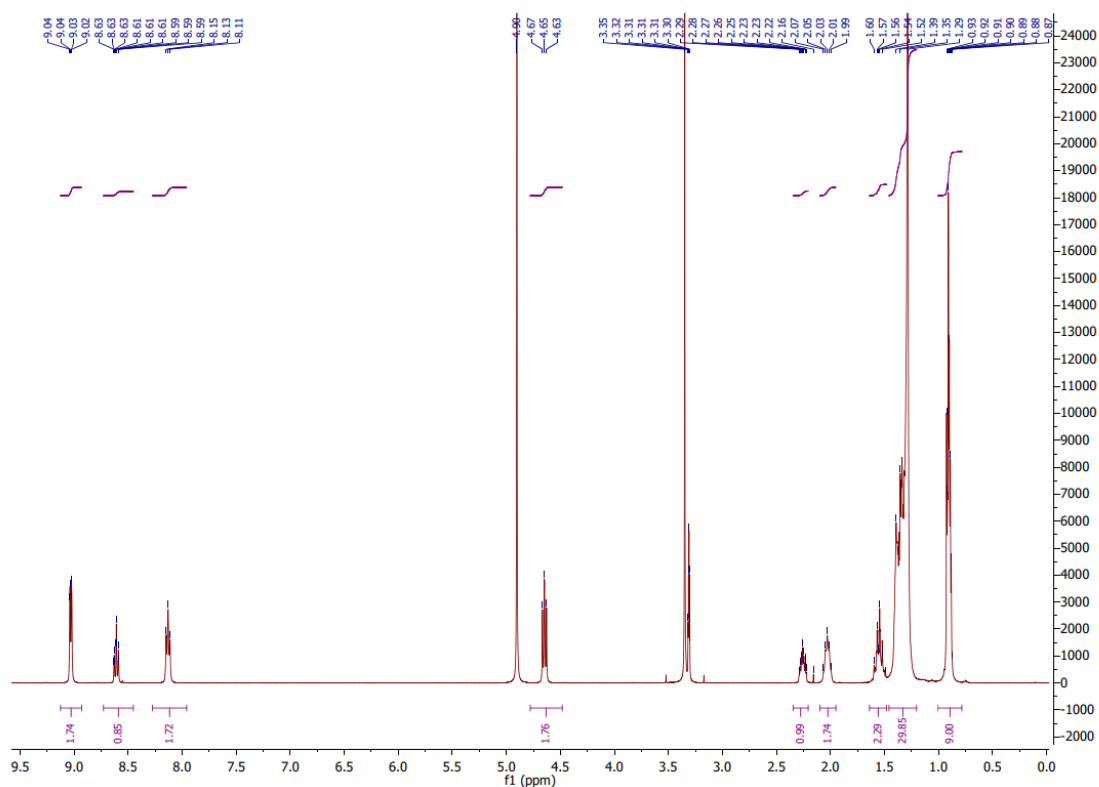

**Figure S4.  $[C_{16}Pyr][VPA]$   $^1H$  NMR spectrum in  $CD_3OD$ .**

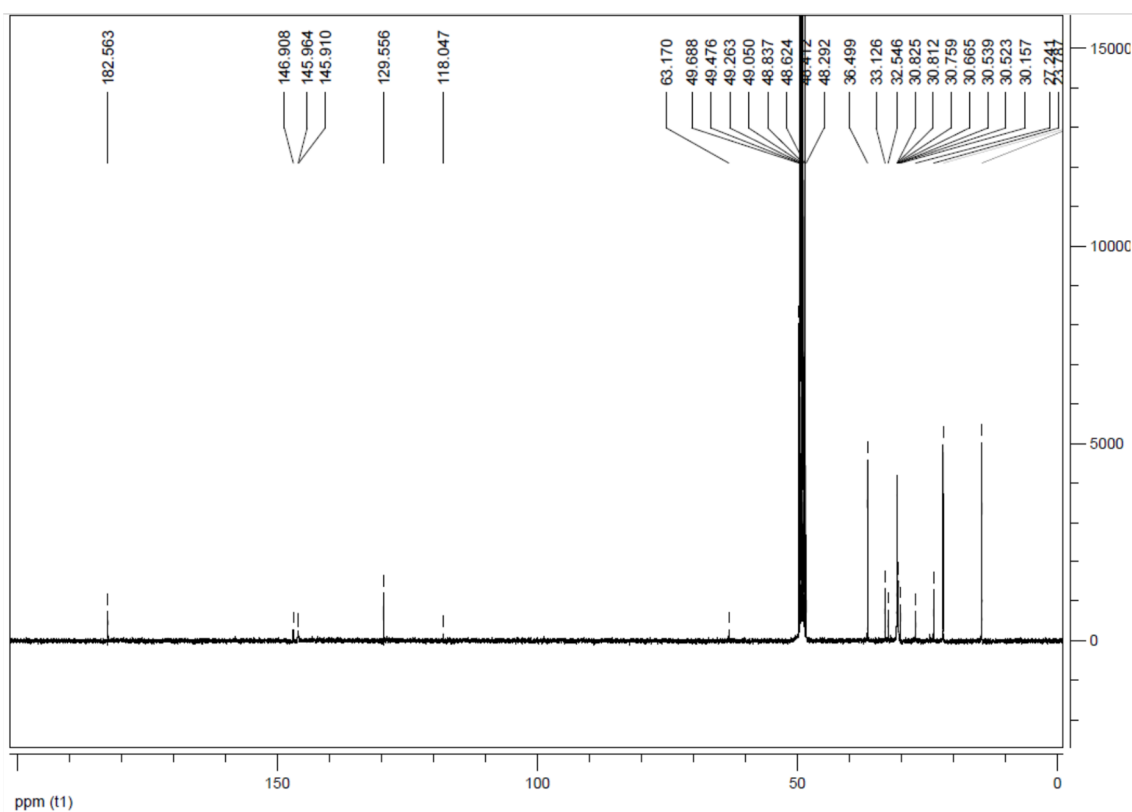

**Figure S5.  $[C_{16}Pyr][VPA]$   $^{13}C$  NMR spectrum in  $CD_3OD$ .**

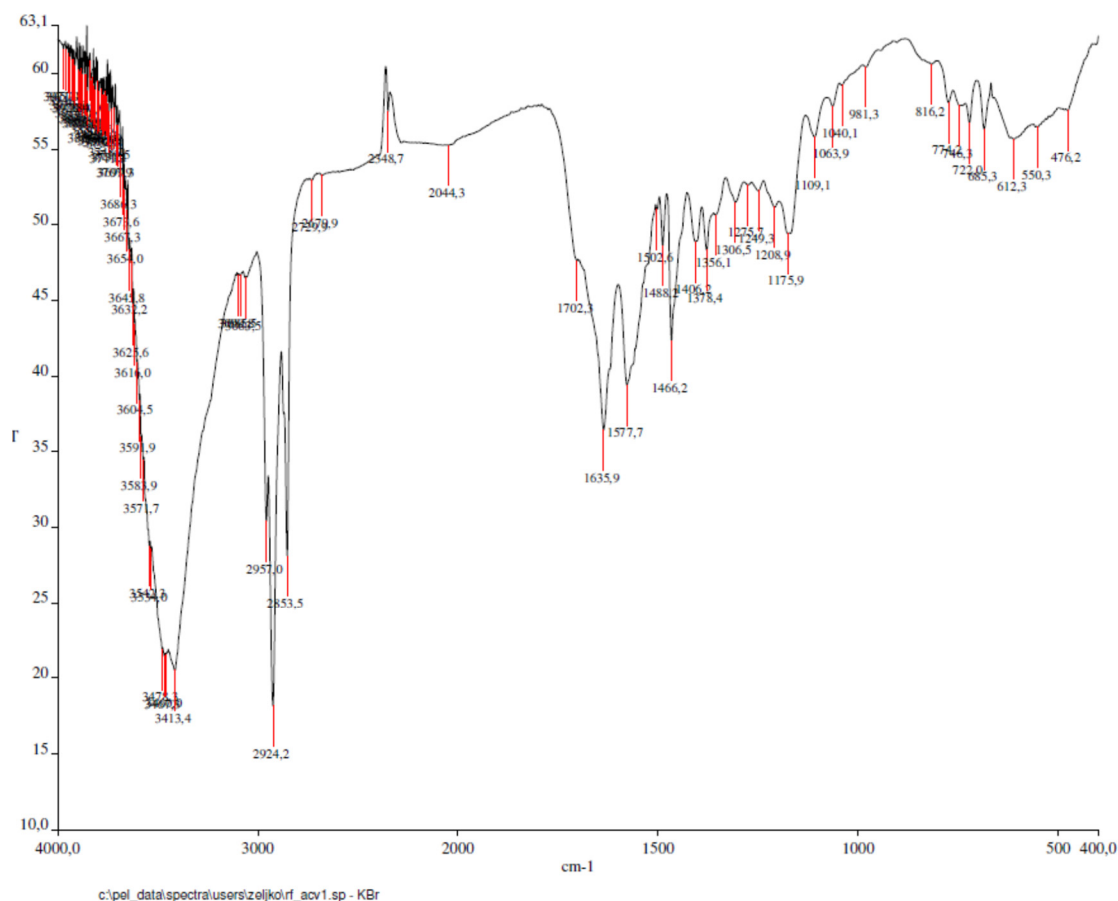

**Figure S6.** [C<sub>16</sub>Pyr][VPA] IR spectrum in KBr.

#### Preparation of 1-ethyl-3-methylimidazolium 2-propylpentanoate [EMiM][VPA]

1-ethyl-3-methylimidazolium bromide (0.3839 g; 2.00 mmol) was dissolved in methanol and passed through ion-exchange column Amberlite IRA-400-OH (5 eq., flow rate 0.133 mL/mL/min = 8 BV/h). Then the 1-ethyl-3-methylimidazolium hydroxide solution was slowly added to valproic acid (0.3032 g; 2.10 mmol; 1.05 eq.) dissolved in methanol. The mixture was stirred at room temperature for 1 h. The solvent and the valproic acid excess were then evaporated and dried in vacuum for 24 h to provide desired product as liquid (0.5032 g; 98.7%). <sup>1</sup>H NMR (400.13 MHz, CDCl<sub>3</sub>) δ = 0.85 (t, *J* = 6.9 Hz, 6H), 1.29-1.62 (m, 11H), 2.22-2.26 (m, 1H), 4.04 (s, 3H), 4.36 (q, *J* = 7.4 Hz, 2H), 5.44 (bs, 1H), 7.18 (s, 1H), 11.26 (s, 1H) ppm; <sup>13</sup>C NMR (100.62 MHz, CDCl<sub>3</sub>) δ = 14.42, 15.58, 21.12, 35.61, 36.47, 45.11, 48.05, 120.85, 122.85, 139.91, 182.29; IR (KBr): ν = 3429, 3158, 3115, 2958, 2933, 2873, 2124, 1638, 1556, 1466, 1406, 1380, 1356, 1310, 1328, 1296, 1250, 1171, 1110, 1032, 960, 851, 754, 701, 669, 649, 623, 558 cm<sup>-1</sup>. Anal. calcd for C<sub>14</sub>H<sub>26</sub>N<sub>2</sub>O<sub>2</sub> C 66.11, H 10.30, N 11.01, found: C 65.97, H 10.53, N 10.55.

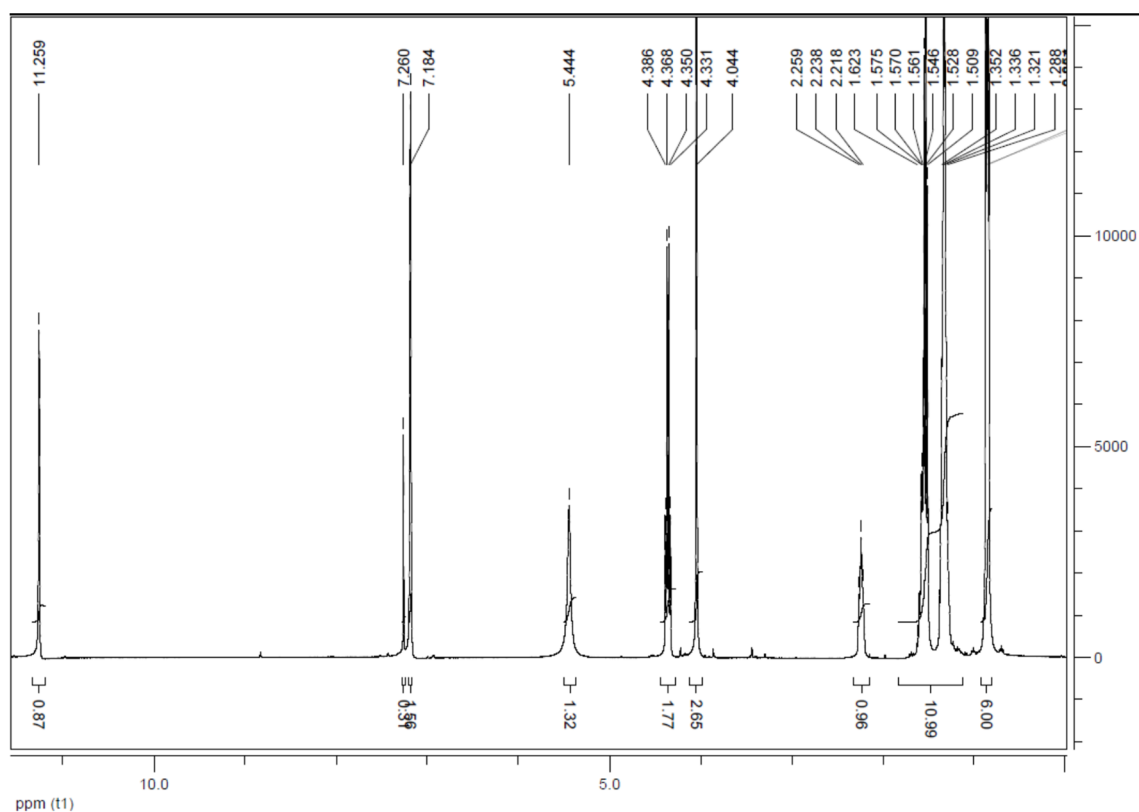

Figure S7. [EMim][VPA] <sup>1</sup>H NMR spectrum in CDCl<sub>3</sub>.

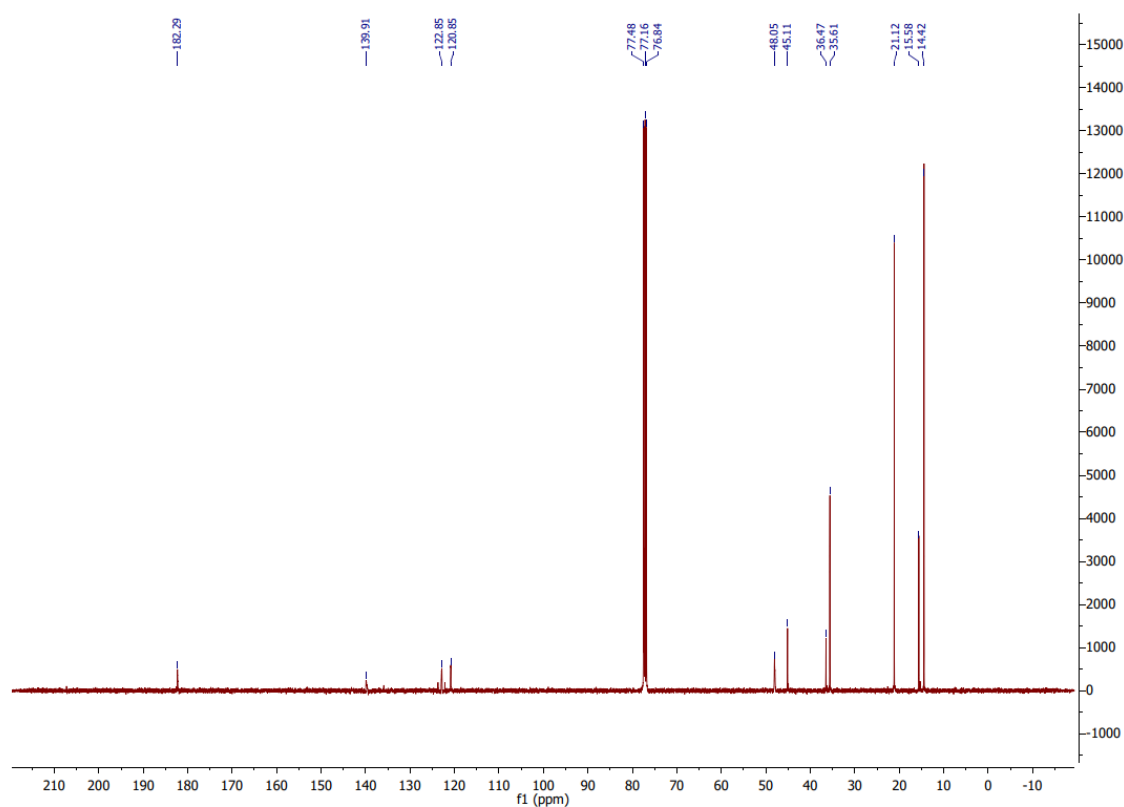

Figure S8. [EMim][VPA] <sup>13</sup>C NMR spectrum in CDCl<sub>3</sub>.

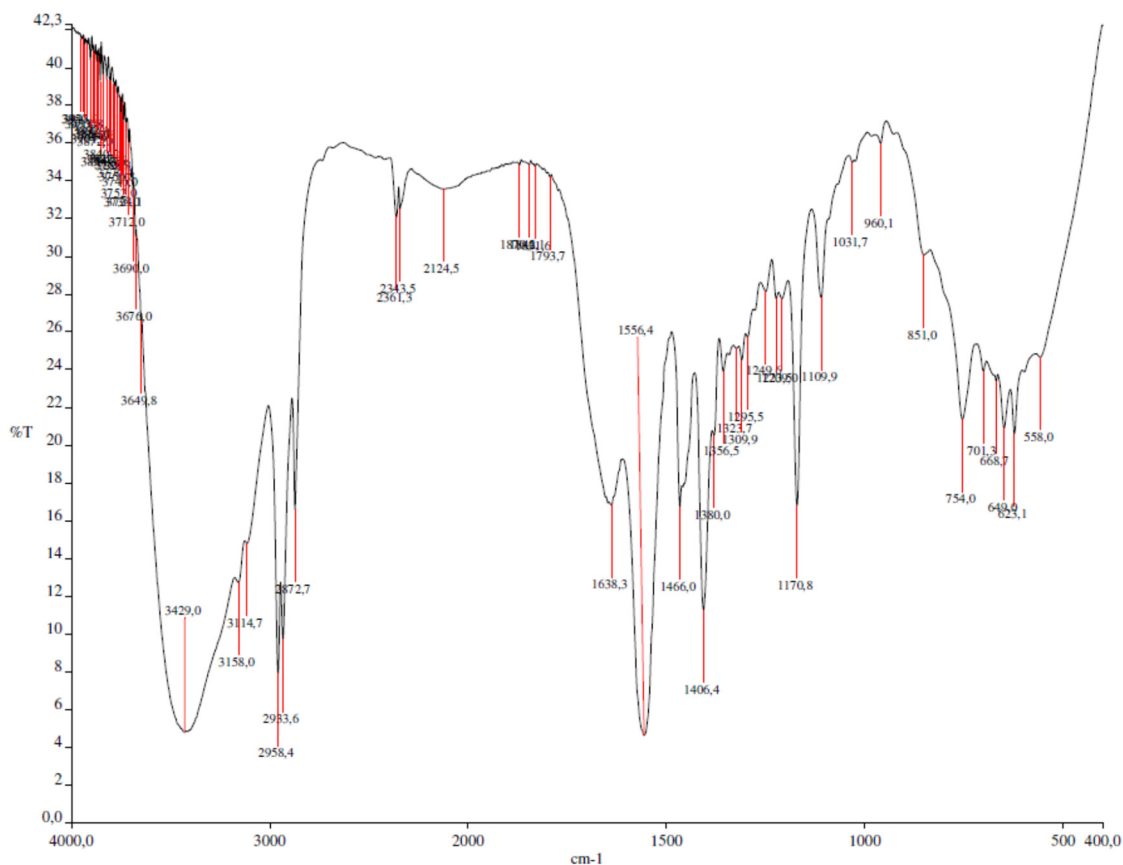

**Figure S9.** [EMiM][VPA] IR spectrum in KBr.

#### Preparation of 1-(2-hydroxyethyl)-3-methylimidazolium 2-propylpentanoate [C<sub>2</sub>OHMiM][VPA]

1-(2-hydroxyethyl)-3-methylimidazolium chloride (0.3224 g; 1.98 mmol) was dissolved in methanol and passed through ion-exchange column Amberlite IRA-400-OH (5 eq., flow rate 0.133 mL/mL/min = 8 BV/h). Then the 1-(2-hydroxyethyl)-3-methylimidazolium hydroxide solution was slowly added to valproic acid (0.3028 g; 2.10 mmol; 1.06 eq.) dissolved in methanol. The mixture was stirred at room temperature for 1 h. The solvent and the valproic acid excess were then evaporated and then dried in vacuum for 24 h to provide desired product as liquid (0.5032 g; 98.7%). <sup>1</sup>H NMR (400.13 MHz, (CDCl<sub>3</sub>) δ = 0.82 (t, J = 7.0 Hz, 6H), 1.15–1.39 (m, 6H), 1.40–1.62 (m, 2H), 2.14 (dq, J<sub>1</sub> = 8.3 and J<sub>2</sub> = 4.2 Hz, 1H), 3.85–3.87 (m, 2H), 3.90 (s, 3H), 4.11 (bs, 1H), 4.32–4.34 (m, 2H), 7.10 (t, 1.8 Hz, 1H), 7.21 (d, J = 2.3 Hz, 1H), 10.50 (s, 1H); <sup>13</sup>C NMR (100.62 MHz, CDCl<sub>3</sub>) δ = 14.32, 21.04, 35.48, 36.30, 47.67, 52.40, 59.56, 122.24, 139.83, 182.54 ppm; IR (KBr): ν = 3435, 3410, 3401, 2958, 2933, 2873, 2126, 1734, 1638, 1552, 1491, 1466, 1452, 1409, 1380, 1341, 1311, 1295, 1225, 1167, 1110, 1068, 944, 837, 753, 701, 668, 651, 622 cm<sup>-1</sup>. Anal. calcd for C<sub>14</sub>H<sub>26</sub>N<sub>2</sub>O<sub>3</sub>·H<sub>2</sub>O C 58.31, H 9.71, N 9.71, found: C 58.31, H 9.61, N 10.15.

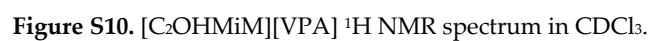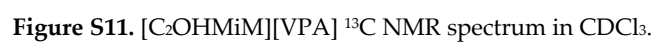



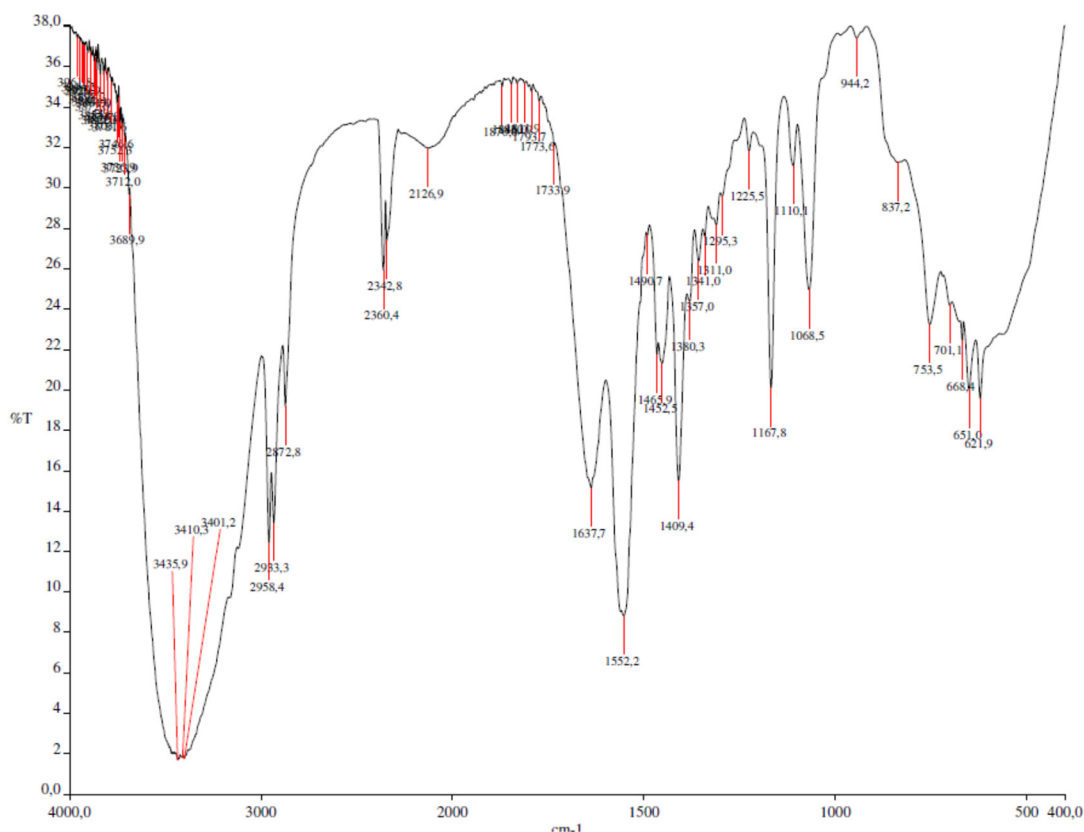

**Figure S12.** [C<sub>2</sub>OHMiM][VPA] IR spectrum in KBr.

#### Preparation of 1-(2-hydroxyethyl)-2,3-dimethylimidazolium 2-propylpentanoate [C<sub>2</sub>OHDMiM][VPA]

1-(2-hydroxyethyl)-2,3-dimethylimidazolium chloride (0.6536 g; 3.70 mmol) was dissolved in methanol and passed through ion-exchange column Amberlite IRA-400-OH (5 eq., flow rate 0.133 mL/mL/min = 8 BV/h). Then the 1-(2-hydroxyethyl)-2,3-dimethylimidazolium hydroxide solution was slowly added to valproic acid (0.609 g; 4.22 mmol; 1.14 eq.) dissolved in methanol. The mixture was stirred at room temperature for 1 h. The solvent and the valproic acid excess were then evaporated and dried in vacuum for 24h to provide desired product as liquid (1.3054 g; 88.6%). <sup>1</sup>H NMR (400.13 MHz, CD<sub>3</sub>OD) δ = 0.90 (t, *J*=7.1 Hz, 6H), 1.18-1.63 (m, 8H), 2.20 (dd, *J*<sub>1</sub>=9.2 and *J*<sub>2</sub>=4.7 Hz, 1H), 2.61-2.63 (m, 3H\*), 3.80 (s, 3H), 3.85-3.88 (m, 2H), 4.25-4.27 (t, 2H), 7.51 (dd, *J*<sub>1</sub>=15.5 and *J*<sub>2</sub>=2.1 Hz) ppm; <sup>13</sup>C NMR (100.62 MHz, CD<sub>3</sub>OD) δ = 14.74, 22.27, 35.42, 37.18, 50.50, 51.86, 61.42, 122.60, 123.61, 185.39 ppm; IR (KBr): ν = 3468, 3434, 2959, 2933, 2873, 2121, 1749, 1639, 1590, 1546, 1453, 1410, 1383, 1358, 1359, 1311, 1281, 1250, 1167, 1117, 1070, 944, 869, 848, 754, 713, 667 cm<sup>-1</sup>. Anal. calcd for C<sub>15</sub>H<sub>28</sub>N<sub>2</sub>O<sub>3</sub> C, 63.35; H, 9.92; N, 9.85, found: C 63.59, H 10.05, N 10.25.

\* CH<sub>3</sub> group lacking intensity mostly due to H-D exchange, see for example [1].

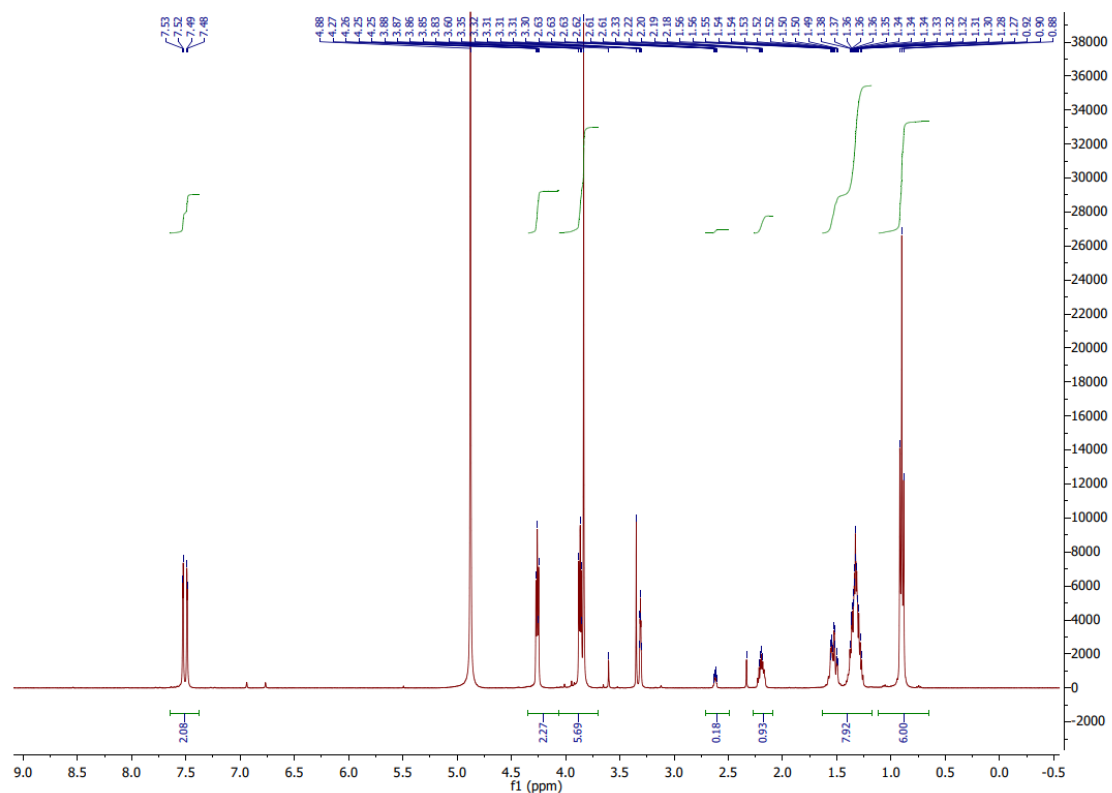

Figure S13. [C<sub>2</sub>OHDMiM][VPA] <sup>1</sup>H NMR spectrum in CD<sub>3</sub>OD.

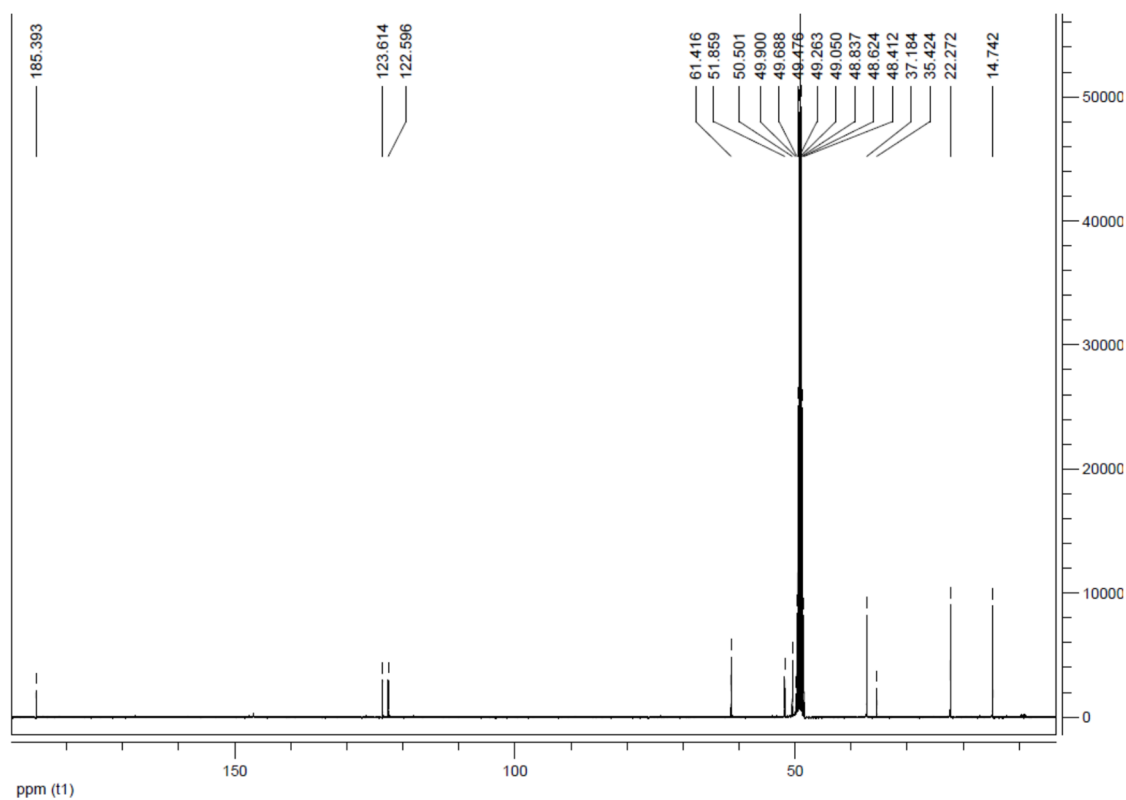

Figure S14. [C<sub>2</sub>OHDMiM][VPA] <sup>13</sup>C NMR spectrum in CD<sub>3</sub>OD.

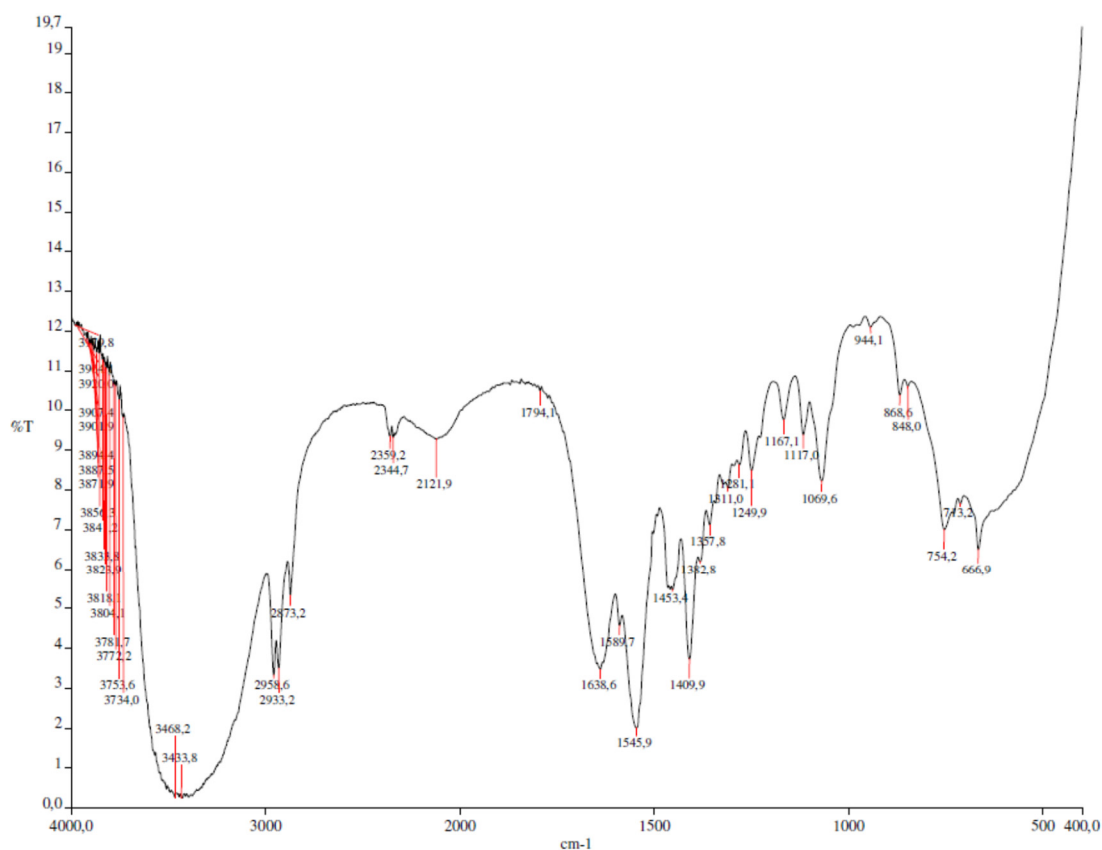

**Figure S15.** [C<sub>2</sub>OHDMiM][VPA] IR spectrum in KBr.

#### Preparation of 1-(2-methoxyethyl)-3-methylimidazolium 2-propylpentanoate [C<sub>3</sub>OMiM][VPA]

1-(2-methoxyethyl)-3-methylimidazolium chloride (0.7098 g; 4.02 mmol) was dissolved in methanol and passed through ion-exchange column Amberlite IRA-400-OH (5 eq., flow rate 0.133 mL/mL/min = 8 BV/h). Then the 1-(2-methoxyethyl)-3-methylimidazolium hydroxide solution was slowly added to valproic acid (0.6064 g; 4.20 mmol; 1.05 eq.) dissolved in methanol. The mixture was stirred at room temperature for 1 h. The solvent and the valproic acid excess were then evaporated and dried in vacuum for 24h to provide desired product as liquid (1.3427 g; 94.1%). <sup>1</sup>H NMR (400.13 MHz, CDCl<sub>3</sub>) δ = 0.90 (t, *J* = 7.2 Hz 6H), 1.26-1.56 (m, 8H), 2.17-2.24 (m, 1H), 3.36 (s, 1H), 3.73 (t, *J* = 4.8 Hz, 2H), 3.94 (s, 3H), 4.39 (t, *J* = 4.8, 2H), 7.57 (d, *J* = 1.8 Hz, 1H), 7.62 (d, *J* = 1.8 Hz, 1H) ppm; <sup>13</sup>C NMR (100.62 MHz, CDCl<sub>3</sub>) δ = 14.74, 22.27, 36.47, 37.18, 50.47, 50.78, 59.17, 71.18, 124.13, 124.70, 185.33 ppm; IR (KBr): ν = 3434, 3411, 2958, 2933, 2873, 2090, 1639, 1563, 1552, 1454, 1409, 1384, 1357, 1341, 1311, 1295, 1225, 1170, 1118, 1079, 1036, 1012, 968, 940, 832, 753, 702, 652, 622 cm<sup>-1</sup>. Anal. calcd for C<sub>15</sub>H<sub>28</sub>N<sub>2</sub>O<sub>3</sub>: C, 63.35; H, 9.92; N, 9.85, found: C 63.31, H 9.52, N 10.14.

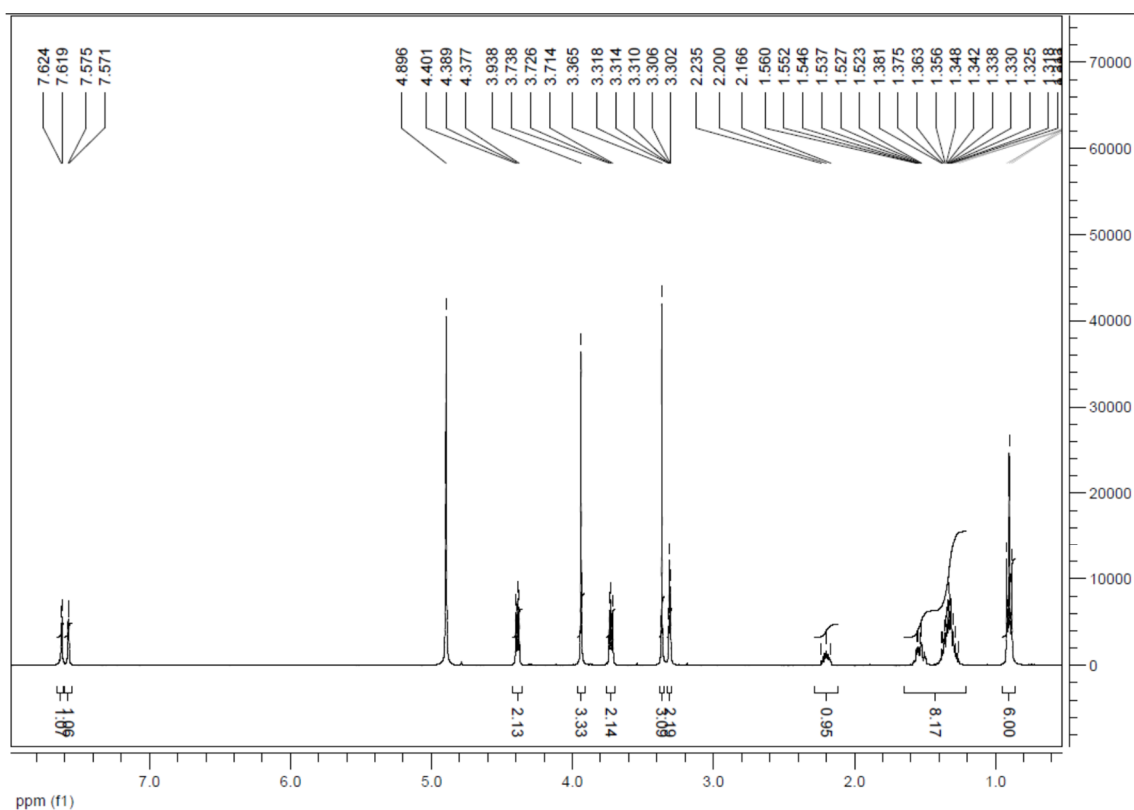

Figure S16. [C<sub>3</sub>OMiM][VPA] <sup>1</sup>H NMR spectrum in CD<sub>3</sub>OD.

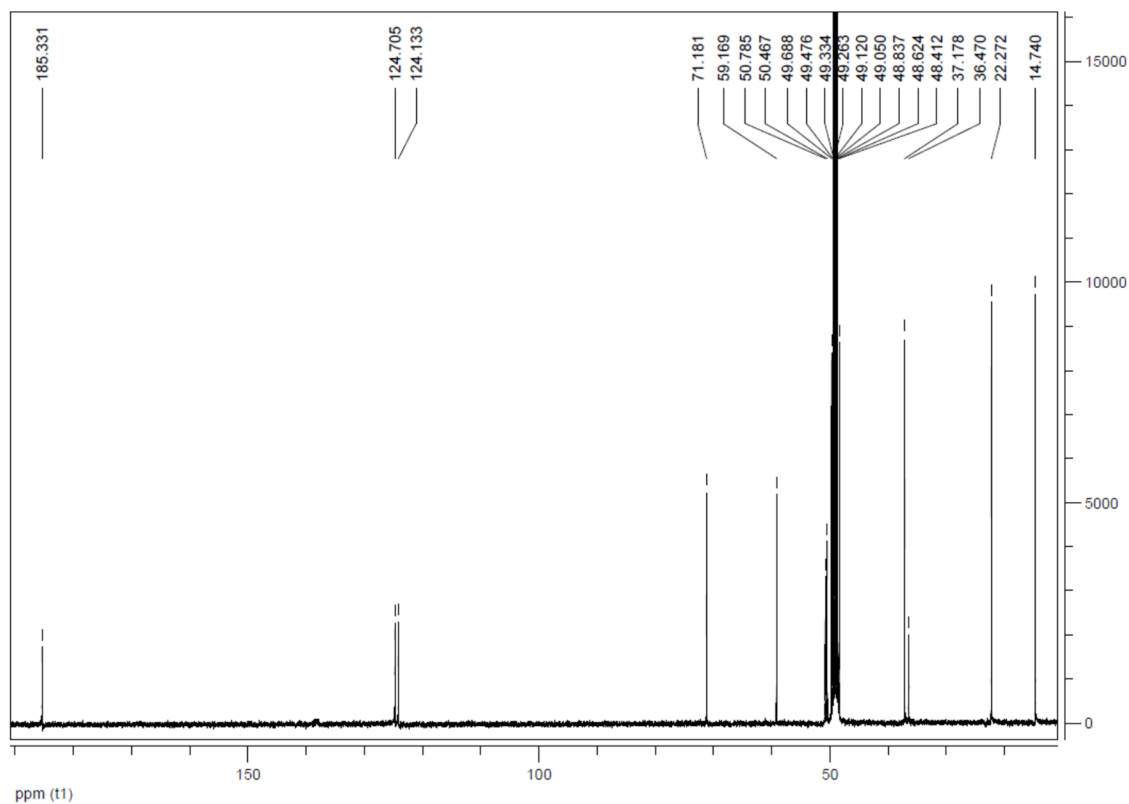

Figure S17. [C<sub>3</sub>OMiM][VPA] <sup>13</sup>C NMR spectrum in CD<sub>3</sub>OD.

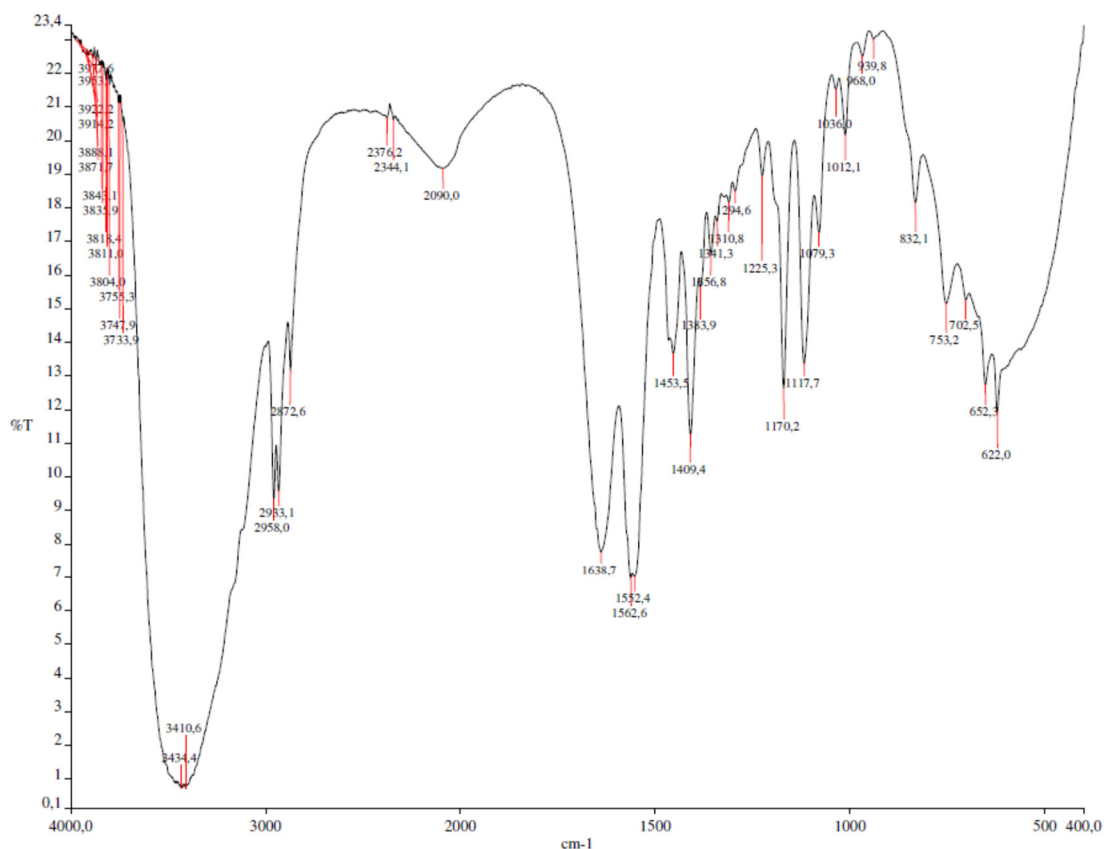

**Figure S18.** [C<sub>3</sub>OMiM][VPA] IR spectrum in KBr.

## 2. Cell Culture Studies

**Procedure:** Cells were maintained in a-minimal essential medium (a-MEM) containing 10% fetal bovine serum, 100 IU/mL penicillin, 2.5 mg/mL streptomycin, 2.5 mg/mL amphotericin B, and 50 mg/mL ascorbic acid. At ~70–80% confluence, cells were enzymatically detached with 0.05% trypsin and 0.5 mM EDTA and seeded at 10<sup>4</sup> cells/cm<sup>2</sup>. After an attachment period of 24 h, the culture medium was renewed and supplemented with various concentrations (0.005–500 mM) of the ampicillin-based ILs. Cell cultures were maintained in a 5% CO<sub>2</sub> humidified atmosphere at 37 °C. Cellular viability/proliferation was assessed by MTT assay on days 1, 3, and 5 of the culture. This assay is based on the reduction of 3-(4,5-dimethylthiazol-2-yl)-2,5-diphenyltetrazolium bromide to a purple formazan product by viable cells. Briefly, cultured cells were incubated at 37 °C with MTT (0.5 mg/mL) for 4 h. The culture medium was then removed; the stained product was dissolved in DMSO, and absorbance was measured at  $\lambda = 550$  nm in an ELISA plate reader. Results were expressed as absorbance per square centimeter (A/cm<sup>2</sup>) [2]. Half-maximal inhibitory concentration (IC<sub>50</sub>) and median lethal dose (EC<sub>50</sub>) values were obtained by nonlinear regression analysis of concentration–effect curves, using GraphPad Prism software [3]. The definition of IC<sub>50</sub> is given by Sebaugh [4] as “the response corresponding to the 50% control (the mean of the 0% and 100% assay controls)” and is used to measure the efficacy of a compound in inhibiting any biochemical or biological function. EC<sub>50</sub> is the concentration of a drug that gives half-maximal [4].

## References

1. Zanatta, M.; dos Santos, F.P.; Biehl, C.; Marin, G.; Ebeling, G.; Netz, P.A.; Dupont, J. Organocatalytic Imidazolium Ionic Liquids H/D Exchange Catalysts. *J. Org. Chem.* **2017**, *82*, 2622–2629. <https://doi.org/10.1021/acs.joc.6b03029>.
2. Gomes, P.S.; Santos, J.D.; Fernandes, M.H. Cell-induced response by tetracyclines on human bone marrow colonized hydroxyapatite and Bonelike®. *Acta Biomater.* **2008**, *4*, 630–637. <https://doi.org/10.1016/j.actbio.2007.12.006>.
3. Barros, A.V.; Araujo, L.M.; de Oliveira, F.F.; da Conceicao, A.O.; Simoni, I.C.; Fernandes, M.J.B.; Arns, C.W. In Vitro Evaluation of the Antiviral Potential of *Guettarda angelica* Against Animal Herpesviruses. *Acta Sci. Vet.* **2012**, *40*, 1–7.
4. Sebaugh, J.L. Guidelines for accurate EC50/IC50 estimation. *Pharm. Stat.* **2011**, *10*, 128–134. <https://doi.org/10.1002/pst.426>.
